# Supplementary material for: The landscape of mitochondrial small non-coding RNAs in the PGCs of male mice, spermatogonia, gametes and in zygotes
Source: PubMed Central journal article supplement (PMC6114042; doi:10.1186/s12864-018-5020-3), 2018-08-28
Supplement: 12864_2018_5020_MOESM1_ESM.pdf [file 12864_2018_5020_MOESM1_ESM.pdf]

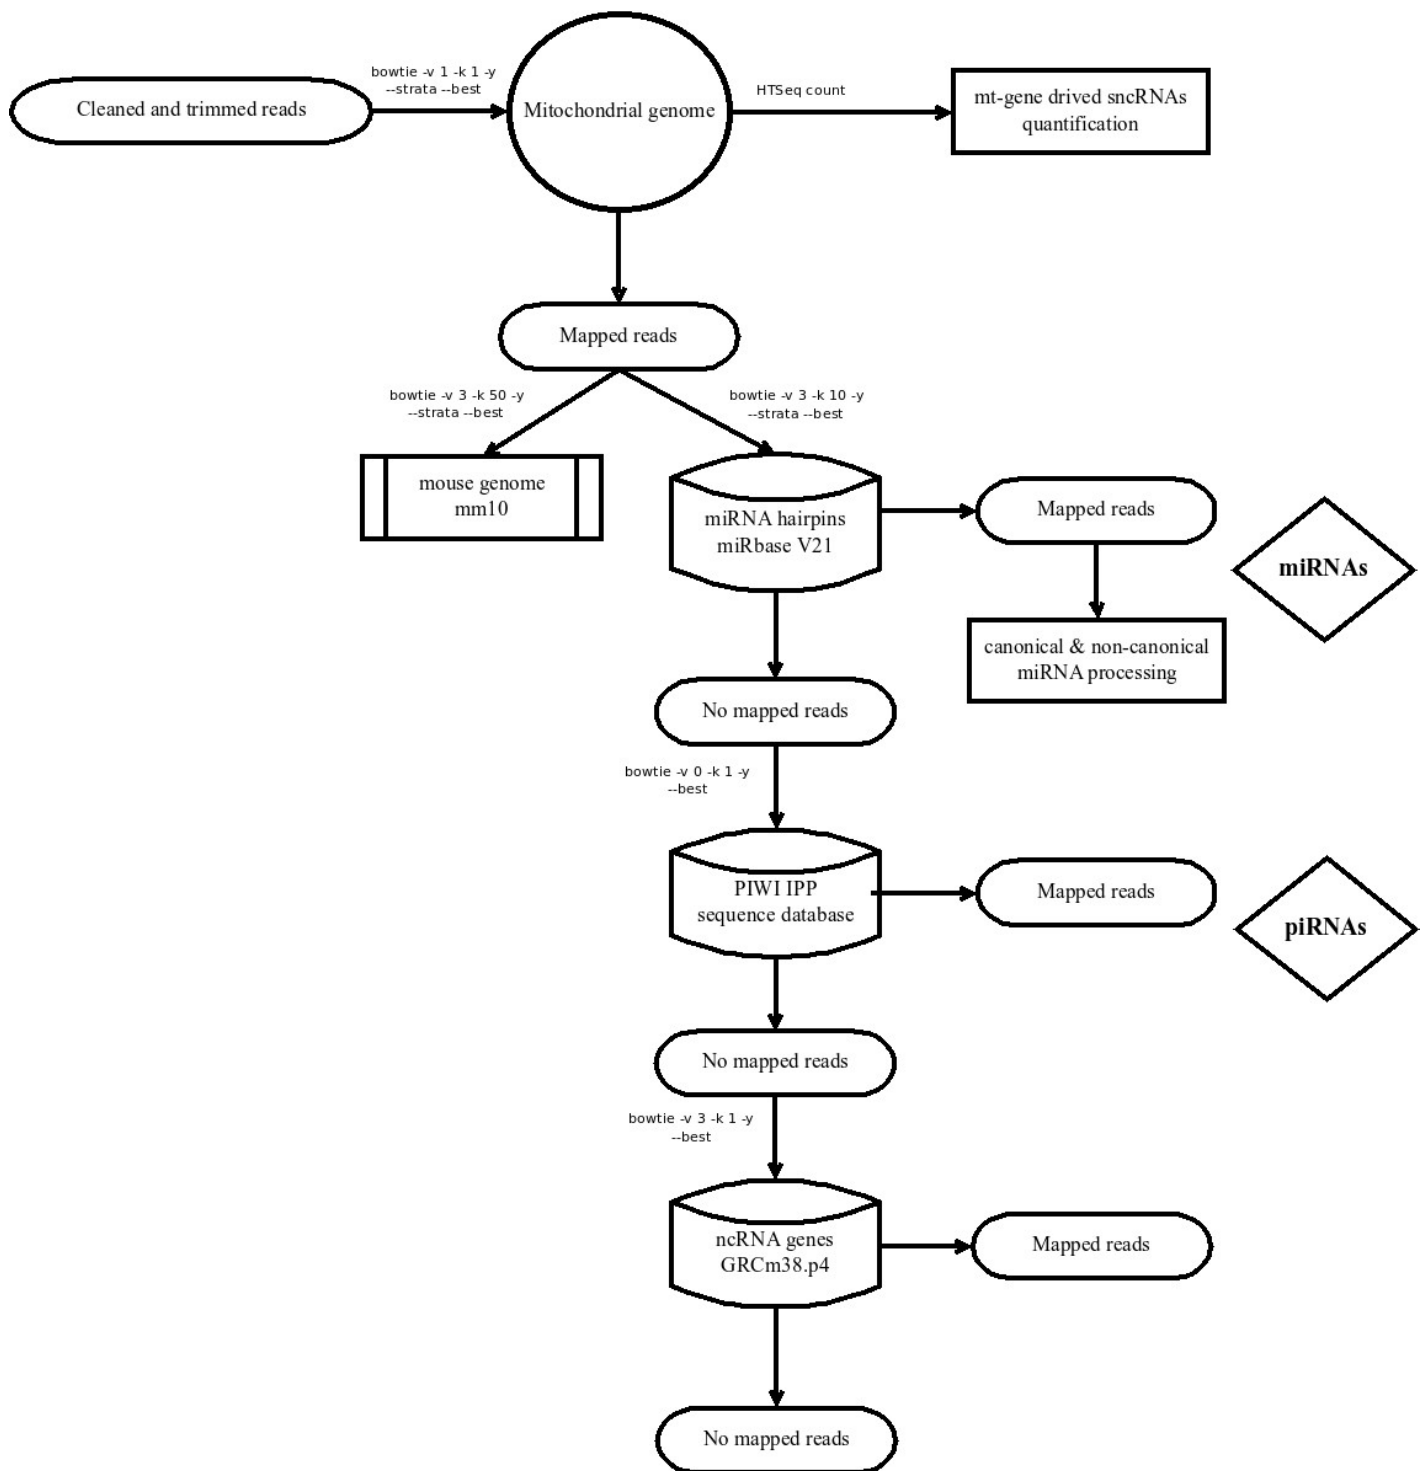

**Figure S1. Bioinformatics pipeline for the sncRNAs derived from mtDNA**

Schematic diagram of sncRNA-seq processing. Mapping program and parameters were indicated. Bowtie (<http://bowtie-bio.sourceforge.net/manual.shtml>) and HTSeq count (<http://www.huber.embl.de/users/anders/HTSeq/doc/overview.html>). Databases: miRBase V21 (<http://www.mirbase.org/>), PIWI IPP (<https://github.com/edugenetico/Immunoprecipitation-piRNA-database.git>) and ncRNA genes from (<http://www.ensembl.org/info/data/ftp/index.html>).

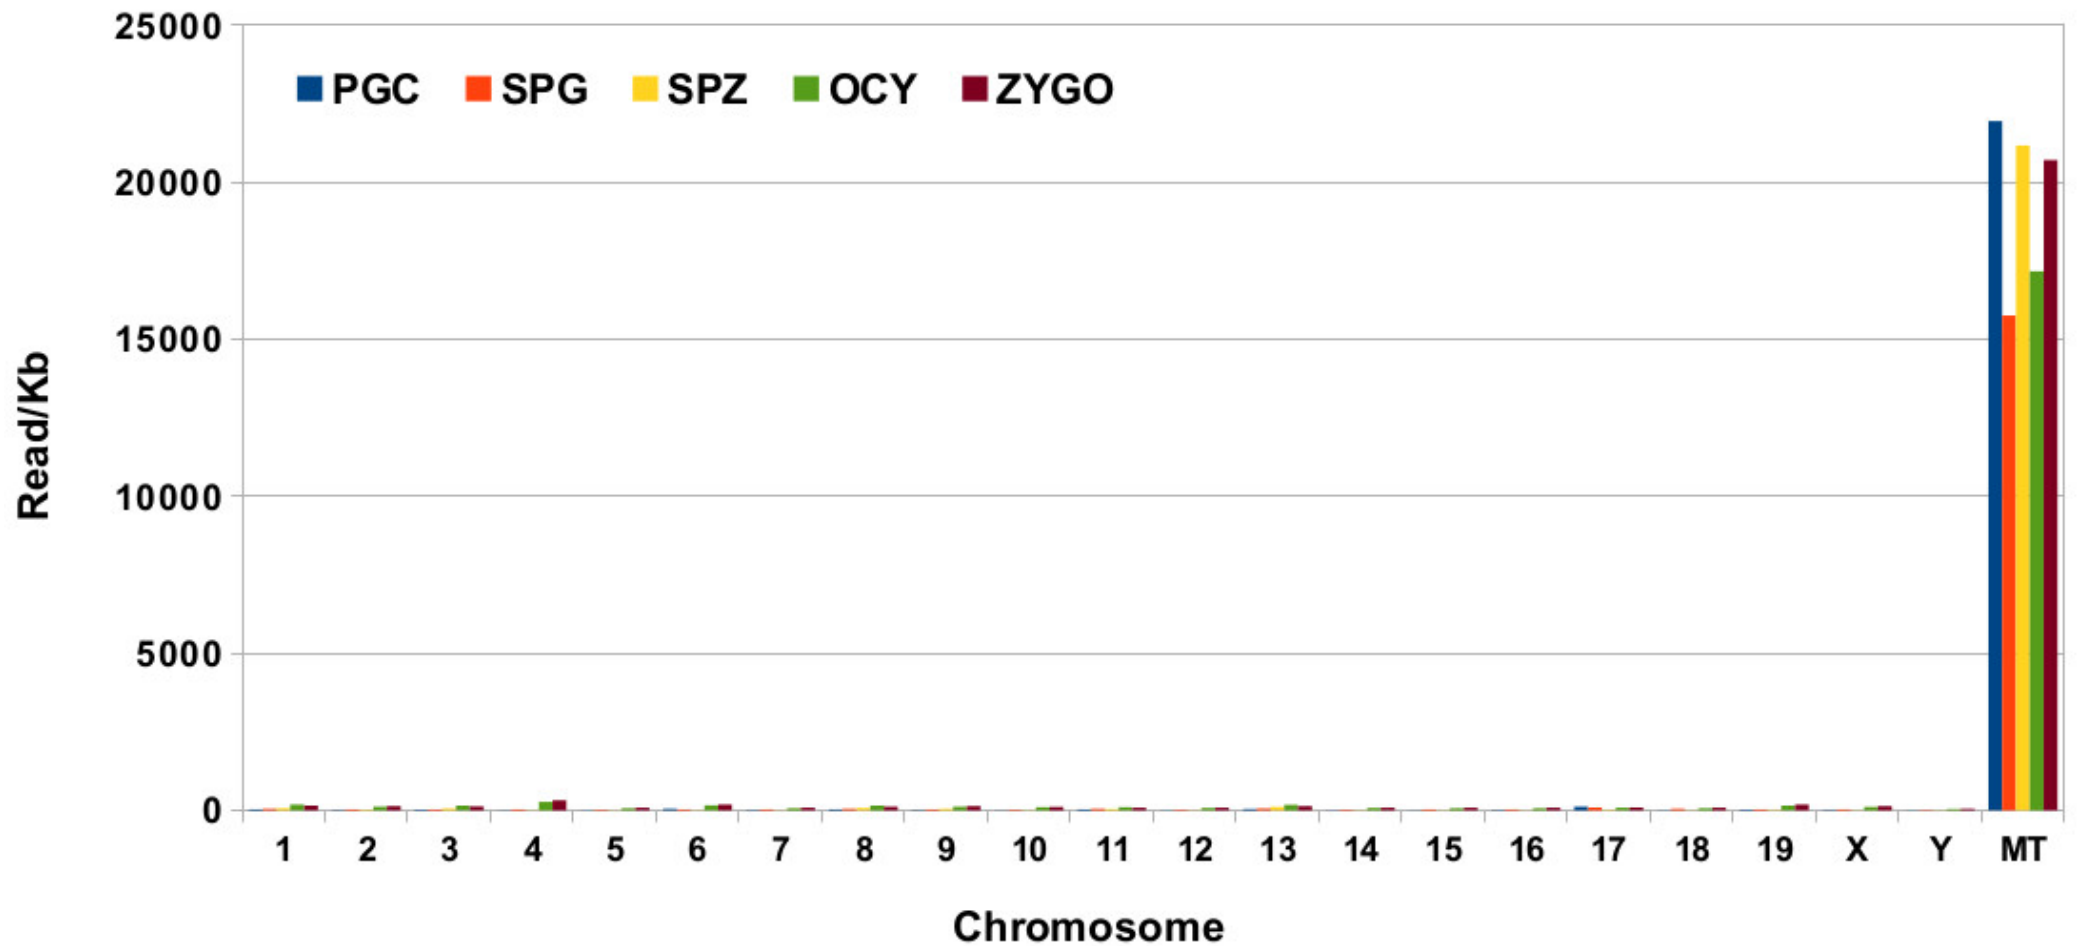

**Figure S2. Density of the sncRNA reads per Kb DNA from the mouse nuclear genome and mtDNA.**

Production of sncRNAs reads from the different chromosomes was carried out using the sncRNA clean reads from PGCs, spermatogonia, spermatozoa, oocytes, and zygotes small RNA-seq libraries. Clean reads were mapped against the mm10 mouse genome containing the mouse mitochondria genome. Reads were aligned using Bowtie up to 1 mismatches and the best ten alignments. Reads per Kb was calculated dividing the mouse chromosome size by the number of mapping reads present in each chromosome.

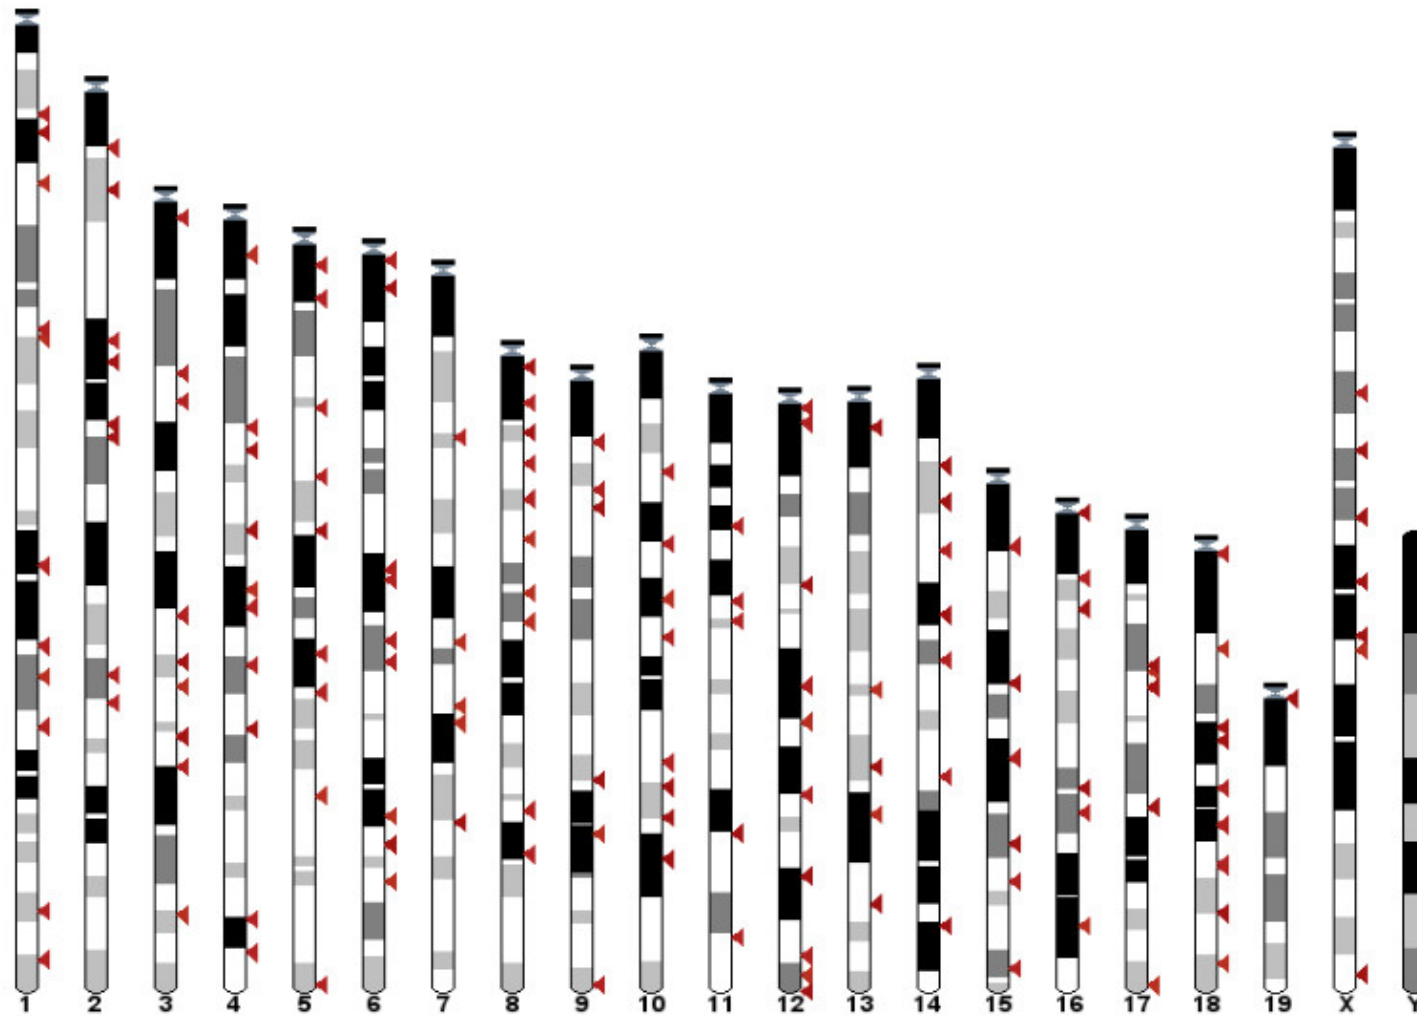

**Figure S3. Nuclear mitochondrial sequences (NUMTs) identified in the mouse genome.**

Identification of NUNTs in mouse genome was carried out by Blast search in Ensembl database. Sequences from coding and non-coding genes of mitochondrial genome were obtained from Emsembl, and used as a query for Blastn analyses against the mm10 mouse genome assembling. Image shows a mitochondrial sequences (red triangles) distribution in mouse chromosomes.

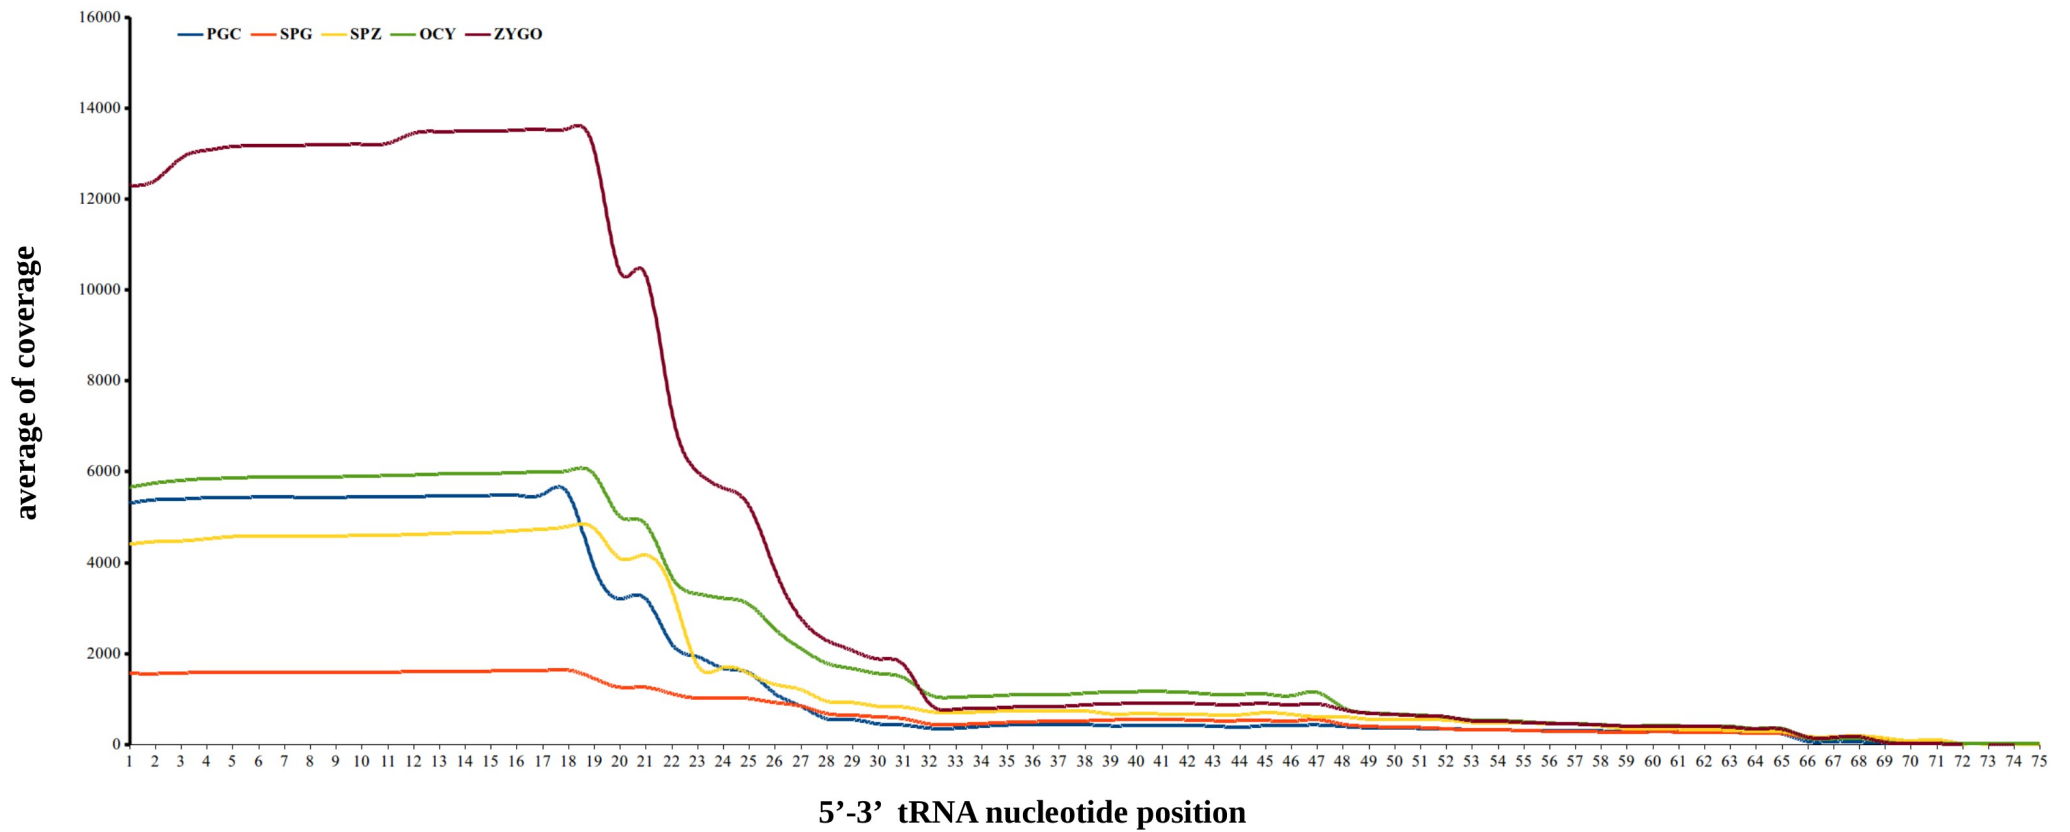

**Figure S4. Average nucleotide coverage of the mito-piRNAs in mt-tRNAs.**

Average of coverage per nucleotide position of mitopiRNAs in mt-tRNAs. Per base coverage was calculated using BEDTools suite (<http://bedtools.readthedocs.io/en/latest/content/bedtools-suite.html>). Different cell types are represented by different colors. Graphs represent the average of coverage of mitopiRNA in different mt-tRNA. Data was not normalized.

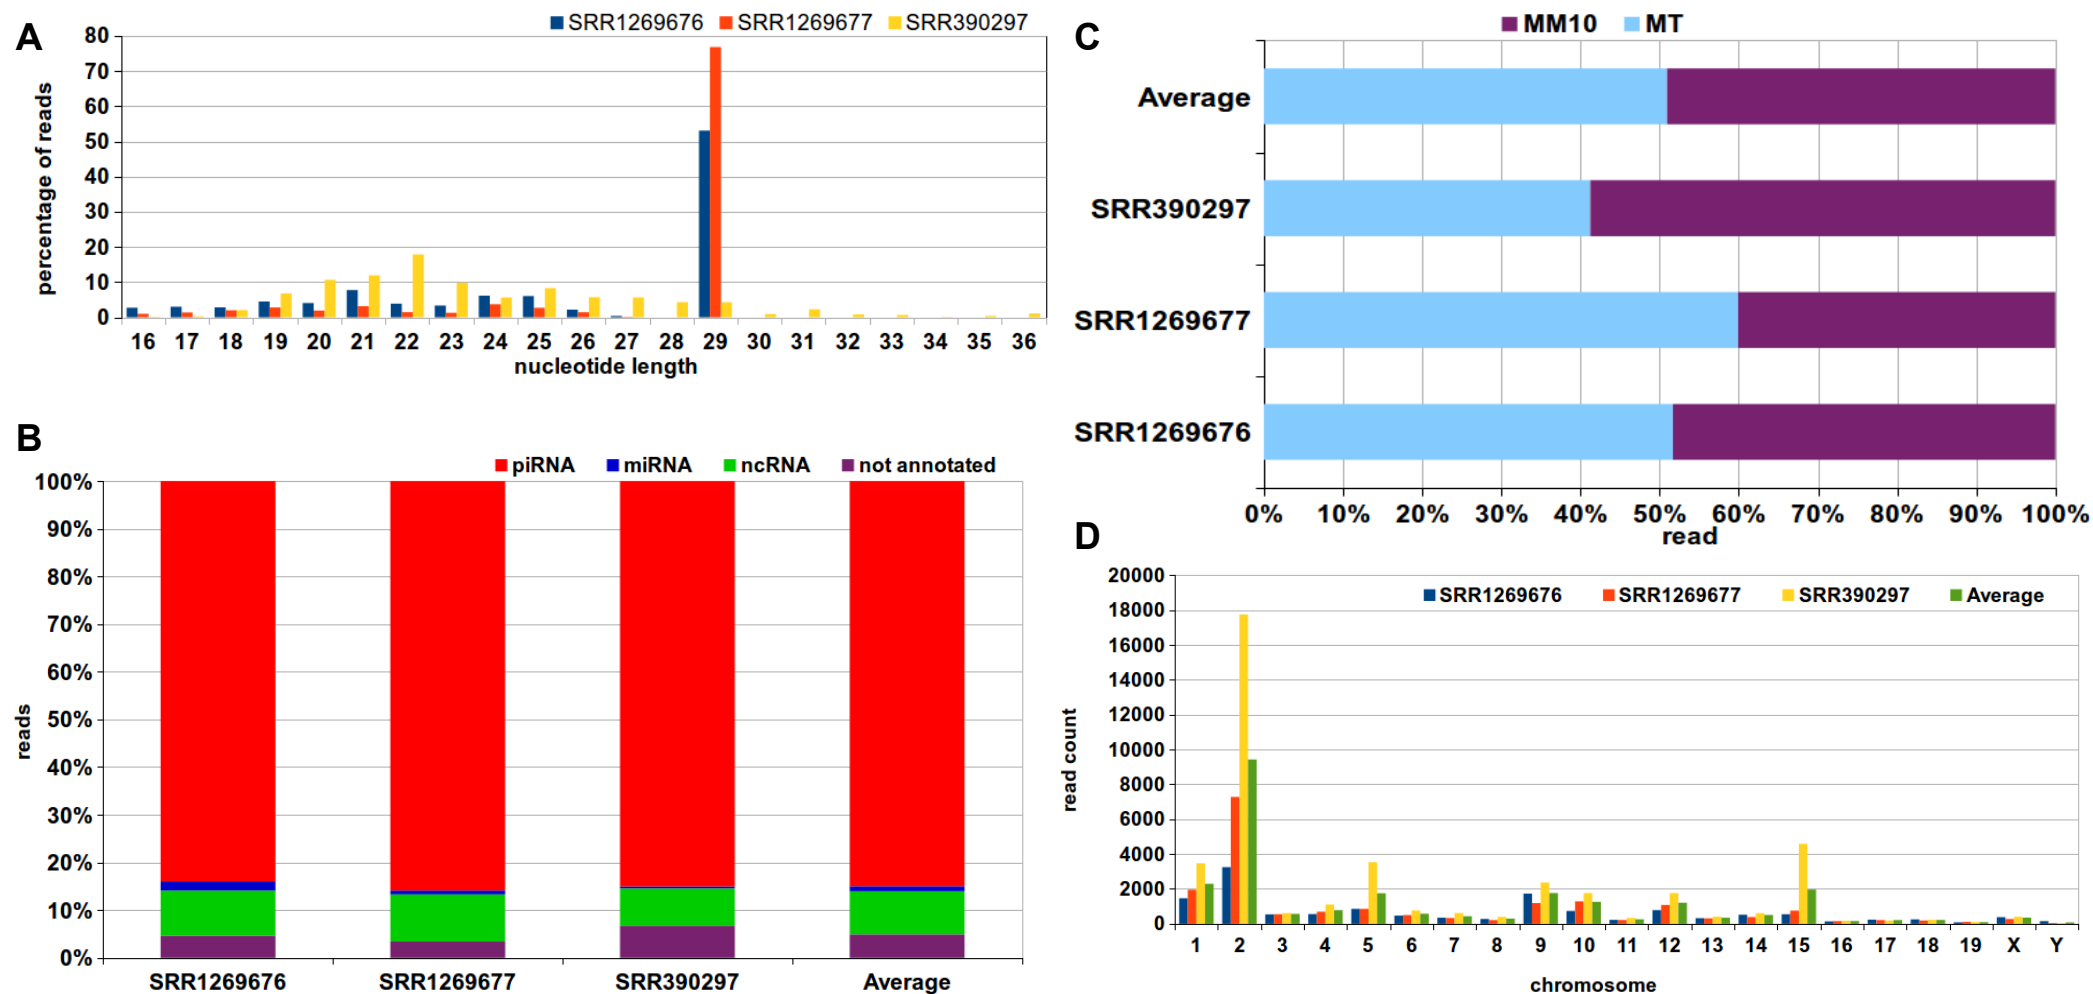

**Figure S5. Characterization of mitosRNA from the 3T3-L1 cell datasets**

A) Read length distribution of sncRNAs derived from mitochondria of 3T3 dataset from GEO database. Percentage of reads was calculated from total reads present in the small RNA-Seq library. B) Classification of 3T3 mitochondria encoded sncRNAs in microRNAs (miRNA, blue), PIWI interacting RNA (piRNA, red) and sequences from non-coding RNAs present in Ensembl database (ncRNAs, green). Reads that not map in previous databases are considered as not annotated in purple. Average correspond to mean of 3 NGS libraries read counts. C) Percentage of mitochondrial encoded sncRNAs that map in mouse genome (MM10) and exclusives of mitochondrial genome (MT). Average correspond to mean of 3 NGS libraries D) Mouse chromosome distribution of read from identified mitochondria associated sncRNAs. Average correspond to mean of 3 NGS libraries

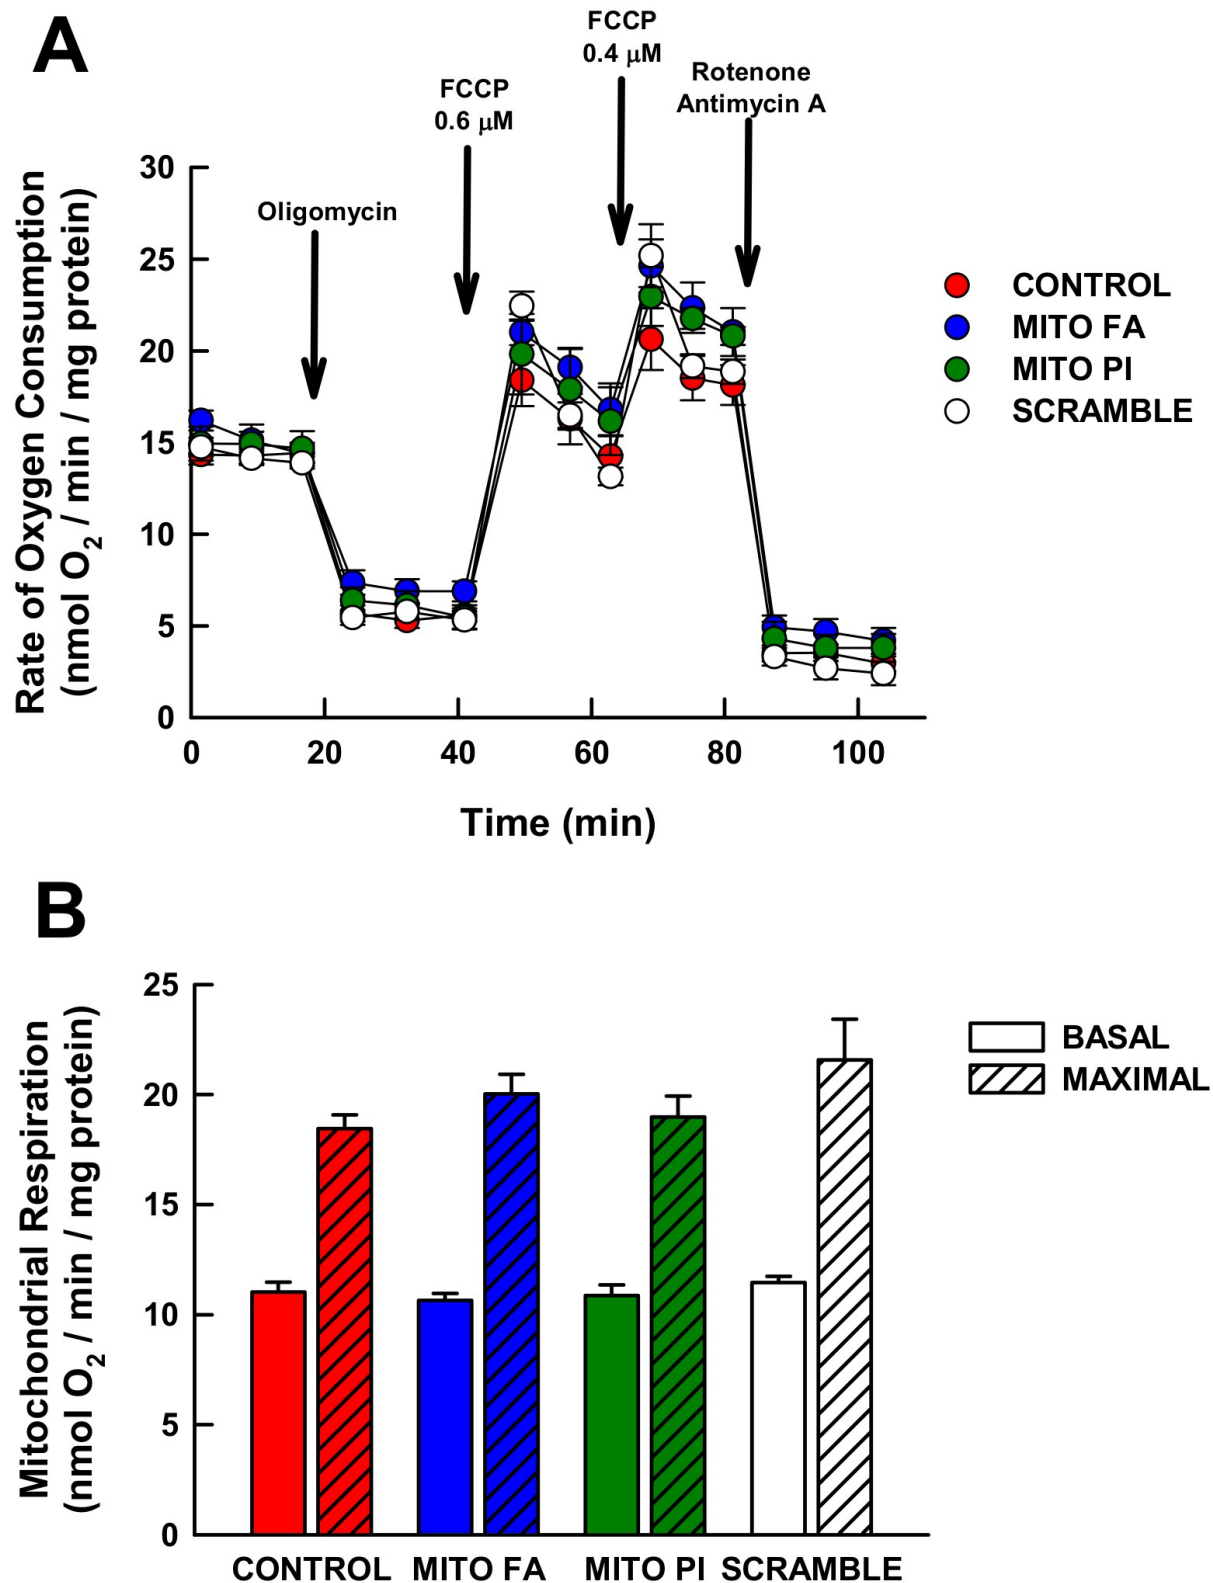

**Figure S6. Effects of mito-*piR*-7456245 inhibition on mitochondrial respiration in 3T3-L1 cells.**

A) Cellular metabolism characterization of 3T3-L1 cells 48 hours after transfection with 250 nM specific *piR*-7456245 antisense LNA GapmeR, 250 nM (MITO PI) and *piR*-7456245 antisense LNA GapmeR fluorescein label (MITO FA) or 250 nM scramble negative probe (SCRAMBLE) and in non-transfected control cells. The characterization was performed using the Seahorse XF24 extracellular flux analyzer. Oligomycin, FCCP and rotenone/antimycin A were added as indicated in the figure to determine the different bioenergetic parameters.

B) Summary of the effects of *piR*-7456245 inhibition on the basal and maximal respiration of 3T3-L1 cells.
