# Supplementary material for: The landscape of mitochondrial small non-coding RNAs in the PGCs of male mice, spermatogonia, gametes and in zygotes
Source: PubMed Central journal article supplement (PMC6114042; doi:10.1186/s12864-018-5020-3), 2018-08-28
Supplement: 12864_2018_5020_MOESM2_ESM.pdf [file 12864_2018_5020_MOESM2_ESM.pdf]

## Supplementary Tables

**Table S1. List of piRNA-specific primer sequences used for qPCR**

| PirBase ID       | Primer sequence                      | Associated gene |
|------------------|--------------------------------------|-----------------|
| piR-mmu-5890709  | 5'-ACTAATCCTAGCCCTAGCCCTACA-3'       | Rnr2            |
| piR-mmu-16137755 | 5'-CATAGTGTTGCTTAATATTAAGCATCTG-3'   | TrnV            |
| piR-mmu-9238634  | 5'-AACATAAAAACGTTAGGTCAAGGTGTAGC-3'  | Rnr1            |
| piR-mmu-25691968 | 5'-GTTAATGTAGCTTAATAACAAAGCAAAGC-3'  | TrnF            |
| piR-mmu-5850420  | 5'-CAAGAAGTAGTTTAATTAGAATACCAGCTT-3' | TrnP            |
| piR-mmu-20317834 | 5'-ATTCACAGTAGGATTAGATGTAGACAC-3'    | COX I           |
| piR-mmu-775559   | 5'-CAGACTATAGGCAATAATCACACTATAAA-3'  | Rnr2            |
| piR-mmu-5142078  | 5'-ACTAATCCTAGCCCTAGCCCTACAC-3'      | Rnr2            |
| piR-mmu-49487030 | 5'-GCAAATTCGTGAAGCGTTCC-3'           | U6              |
| piR-mmu-7456245  | 5'-GAATTGATCAGGACATAGGGTTTGATA-3'    | D-Loop          |

**Table S2. List of targets for *mmu-miR-6390* predicted by miRDB and DIANA-microT**

| Ensembl Gene ID    | Gene    | Annotation                                                           | miTG | TPS |
|--------------------|---------|----------------------------------------------------------------------|------|-----|
| ENSMUSG00000026499 | Acbd3   | acyl-Coenzyme A binding domain containing 3                          | 0.9  | 95  |
| ENSMUSG00000021076 | Actr10  | ARP10 actin-related protein 10                                       | 0.8  | 70  |
| ENSMUSG00000024654 | Asrgl1  | asparaginase like 1                                                  | 0.8  | 81  |
| ENSMUSG00000029467 | Atp2a2  | ATPase, Ca <sup>++</sup> transporting, cardiac muscle, slow twitch 2 | 0.9  | 96  |
| ENSMUSG00000069895 | Atxn1l  | ataxin 1-like                                                        | 0.7  | 85  |
| ENSMUSG00000050996 | Cetn1   | centrin 1                                                            | 0.8  | 76  |
| ENSMUSG00000031327 | Chic1   | cysteine-rich hydrophobic domain 1                                   | 0.8  | 68  |
| ENSMUSG00000039652 | Cpeb3   | cytoplasmic polyadenylation element binding protein 3                | 0.8  | 66  |
| ENSMUSG00000026385 | Dbi     | diazepam binding inhibitor                                           | 0.9  | 94  |
| ENSMUSG00000039768 | Dnajc11 | DnaJ (Hsp40) homolog, subfamily C, member 11                         | 0.7  | 81  |
| ENSMUSG00000038174 | Fam126b | family with sequence similarity 126, member B                        | 0.7  | 82  |
| ENSMUSG00000072568 | Fam84b  | family with sequence similarity 84, member B                         | 0.9  | 54  |
| ENSMUSG00000026193 | Fn1     | fibronectin 1                                                        | 0.7  | 89  |
| ENSMUSG00000039286 | Fndc3b  | fibronectin type III domain containing 3B                            | 0.8  | 59  |
| ENSMUSG00000029563 | Foxp2   | forkhead box P2                                                      | 0.9  | 58  |
| ENSMUSG00000051455 | Gm1564  | predicted gene 1564                                                  | 0.8  | 91  |
| ENSMUSG00000056870 | Gulp1   | GULP, engulfment adaptor PTB domain containing 1                     | 0.8  | 59  |
| ENSMUSG00000032293 | Ireb2   | iron responsive element binding protein 2                            | 0.7  | 67  |
| ENSMUSG00000047976 | Kcna1   | Ka voltage-gated channel, shaker-related subfamily, member 1         | 0.8  | 52  |
| ENSMUSG00000022342 | Kcnv1   | potassium channel, subfamily V, member 1                             | 0.7  | 80  |
| ENSMUSG00000038056 | Kmt2c   | lysine (K)-specific methyltransferase 2C                             | 0.7  | 56  |
| ENSMUSG00000022139 | Mbnl2   | muscleblind-like 2                                                   | 0.8  | 75  |

**Table S2 (continuation)**

| Ensembl Gene ID    | Gene     | Annotation                                               | miTG | TPS |
|--------------------|----------|----------------------------------------------------------|------|-----|
| ENSMUSG00000041132 | N4bp211  | NEDD4 binding protein 2-like 1                           | 0.8  | 63  |
| ENSMUSG00000040536 | Necab1   | N-terminal EF-hand calcium binding protein 1             | 0.7  | 72  |
| ENSMUSG00000034701 | Neurod1  | neurogenic differentiation 1                             | 0.9  | 73  |
| ENSMUSG00000051118 | Olfir77  | olfactory receptor 77                                    | 0.9  | 70  |
| ENSMUSG00000039361 | Picalm   | phosphatidylinositol binding clathrin assembly protein   | 0.7  | 76  |
| ENSMUSG00000017754 | Pltp     | phospholipid transfer protein                            | 0.8  | 68  |
| ENSMUSG00000030704 | Rab6a    | RAB6A, member RAS oncogene family                        | 1.0  | 66  |
| ENSMUSG00000026970 | Rbms1    | RNA binding motif, single stranded interacting protein 1 | 1.0  | 61  |
| ENSMUSG00000048027 | Rgmb     | repulsive guidance molecule family member B              | 0.7  | 62  |
| ENSMUSG00000033282 | Rpgrip11 | Rpgrip1-like                                             | 0.9  | 72  |
| ENSMUSG00000051354 | Samd3    | sterile alpha motif domain containing 3                  | 0.8  | 63  |
| ENSMUSG00000023927 | Satb1    | special AT-rich sequence binding protein 1               | 0.7  | 51  |
| ENSMUSG00000075316 | Scn9a    | sodium channel, voltage-gated, type IX, alpha            | 0.8  | 99  |
| ENSMUSG00000044791 | Setd2    | SET domain containing 2                                  | 0.9  | 70  |
| ENSMUSG00000021432 | Slc35b3  | solute carrier family 35, member B3                      | 0.7  | 67  |
| ENSMUSG00000027109 | Sp3      | trans-acting transcription factor 3                      | 0.8  | 67  |
| ENSMUSG00000056296 | Synpr    | synaptoporin                                             | 0.8  | 67  |
| ENSMUSG00000029287 | Tgfb3    | transforming growth factor, beta receptor III            | 0.9  | 53  |
| ENSMUSG00000013701 | Timm23   | translocase of inner mitochondrial membrane 23           | 0.7  | 63  |
| ENSMUSG00000048022 | Tmem229a | transmembrane protein 229A                               | 0.9  | 52  |
| ENSMUSG00000024614 | Tmx3     | thioredoxin-related transmembrane protein 3              | 0.7  | 97  |
| ENSMUSG00000033454 | Zbtb1    | zinc finger and BTB domain containing 1                  | 0.9  | 89  |
| ENSMUSG00000032846 | Zswim6   | zinc finger SWIM-type containing 6                       | 0.8  | 82  |
| ENSMUSG00000034430 | Zxdc     | ZXD family zinc finger C                                 | 0.8  | 86  |

Prediction scores: TPS, target prediction scores. Higher score, more confidence the prediction. 0-100. miRDB ;

miTG, prediction score. The higher miTG score, higher probability of targeting. 0-1. DIANA-microT.

**Table S3. *In silico* analysis of the mitochondrial localization of mouse PIWI protein isoforms.**

| Gene Name | Transcript name   | Transcript ID               | Protein       | MitoProt II TargetP 1.1 |              |          |
|-----------|-------------------|-----------------------------|---------------|-------------------------|--------------|----------|
|           |                   |                             |               | Probability             | mTP          | RC       |
| MIWI      | Piwil1-001        | ENSMUST00000086056.7        | 862 aa        | 0.3534                  | 0.762        | 3        |
|           | Piwil1-003        | ENSMUST00000195959.1        | 835 aa        | 0.1393                  | 0.762        | 3        |
|           | Piwil1-002        | ENSMUST00000200192.4        | 493 aa        | 0.4362                  | 0.593        | 5        |
| MILI      | Piwil2-201        | ENSMUST00000048129.4        | 971 aa        | 0.4741                  | 0.355        | 5        |
| MIWI2     | <b>Piwil4-201</b> | <b>ENSMUST00000076946.3</b> | <b>878 aa</b> | <b>0.9894</b>           | <b>0.892</b> | <b>2</b> |
|           | Piwil4-001        | ENSMUST00000115644.8        | 848 aa        | 0.2982                  | 0.867        | 2        |
|           | Piwil4-003        | ENSMUST00000136399.7        | 174 aa        | 0.0529                  | 0.501        | 5        |

Sequences, transcript name and ID from mouse PIWIs isoforms were obtained from Ensembl database (<http://www.ensembl.org/index.html>). Mitochondrial targeting and subcellular location of PIWI isoforms were carried out using MITOPROT II and TargetP 1.1, respectively. MitoProt probability to export protein to mitochondria, from 0-1 values. TargetP: mTP values represent a mitochondrial localization score, from 0-1 values; and reliability class (RC), from 1 to 5, where 1 indicates the strongest prediction.

*MITOPROT II* <https://ihg.gsf.de/ihg/mitoprot.html>

*TargetP 1.1* <http://www.cbs.dtu.dk/services/TargetP/>

**Table S4. Description of the small RNA-Seq datasets in 3T3-L1 cells obtained from the GEO database.**

|                       |             |             |             |
|-----------------------|-------------|-------------|-------------|
| <b>NCBI RUN</b>       | SRR1269676  | SRR1269677  | SRR390297   |
| <b>GEO number</b>     | GSE57138    | GSE57138    | GSE34475    |
| <b>BioProject</b>     | PRJNA246123 | PRJNA246123 | PRJNA151355 |
| <b>Run</b>            | SRR1269676  | SRR1269677  | SRR390297   |
| <b>Reads</b>          | 5,401,690   | 5,946,592   | 16,537,853  |
| <b>Reads clipping</b> | 5,104,033   | 5,350,959   | 12,416,227  |
| <b>reads map MT</b>   | 32,298      | 15,881      | 51,29       |
| <b>% sncRNA MT</b>    | 0.6         | 0.3         | 0.4         |
